# Supplementary material for: Glucose Signaling Is Important for Nutrient Adaptation during Differentiation of Pleomorphic African Trypanosomes
Source: PubMed Central journal article supplement (PMC6211221; doi:10.1128/msphere.00366-18), 2018-10-31

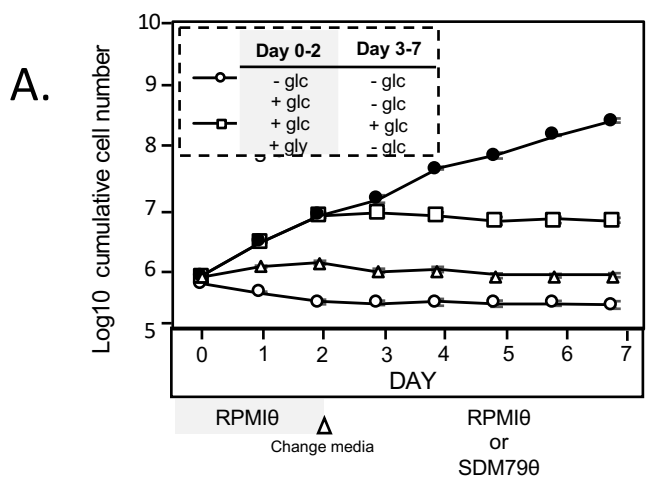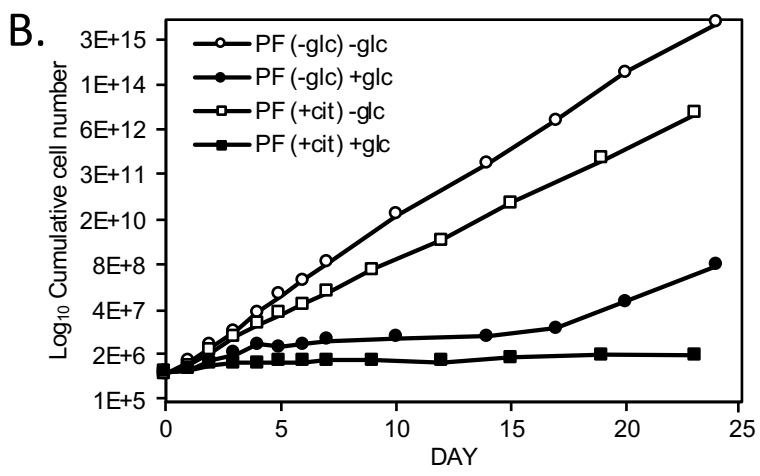

Supplement: sph006182679sf1.pdf [file sph006182679sf1.pdf]
