# Supplementary material for: Glucose Signaling Is Important for Nutrient Adaptation during Differentiation of Pleomorphic African Trypanosomes
Source: PubMed Central journal article supplement (PMC6211221; doi:10.1128/msphere.00366-18), 2018-10-31

A.

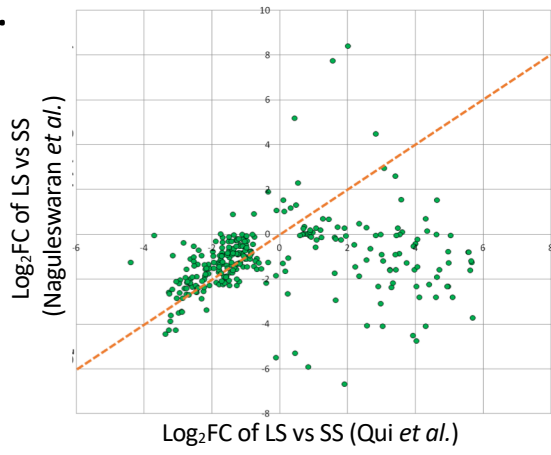

B.

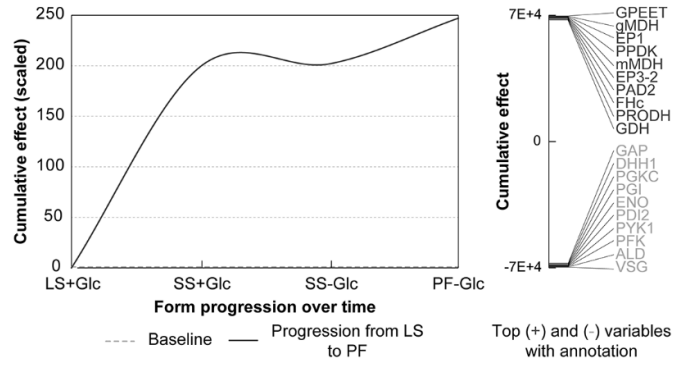

C.

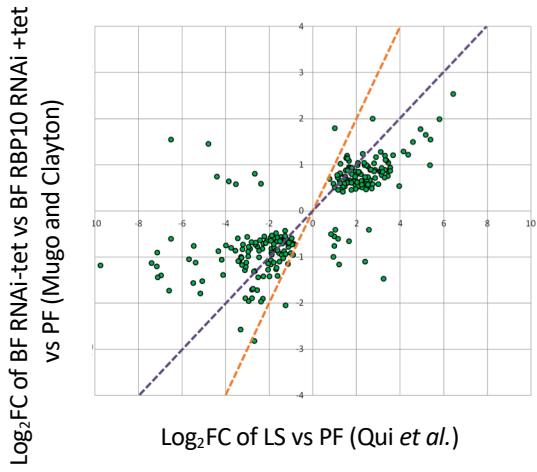

D.

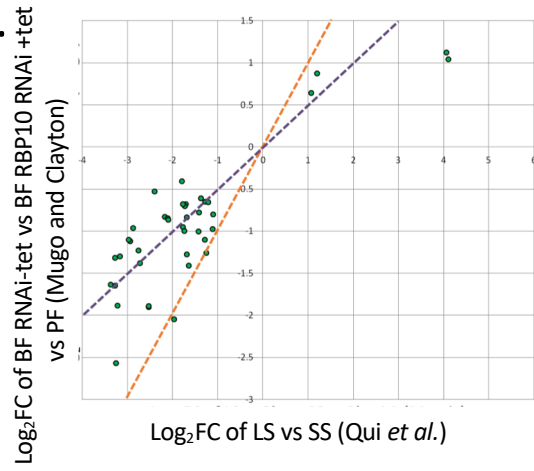

Supplement: sph006182679sf3.pdf [file sph006182679sf3.pdf]
